# Supplementary figures and images for: Multi-omics analyses reveal bacteria and catalase associated with keloid disease
Source: PubMed Central journal article supplement — eBioMedicine. 2023 Dec 6;99:104904. doi: 10.1016/j.ebiom.2023.104904 (PMC10749884; doi:10.1016/j.ebiom.2023.104904), 2023-12-06

Figure 5c

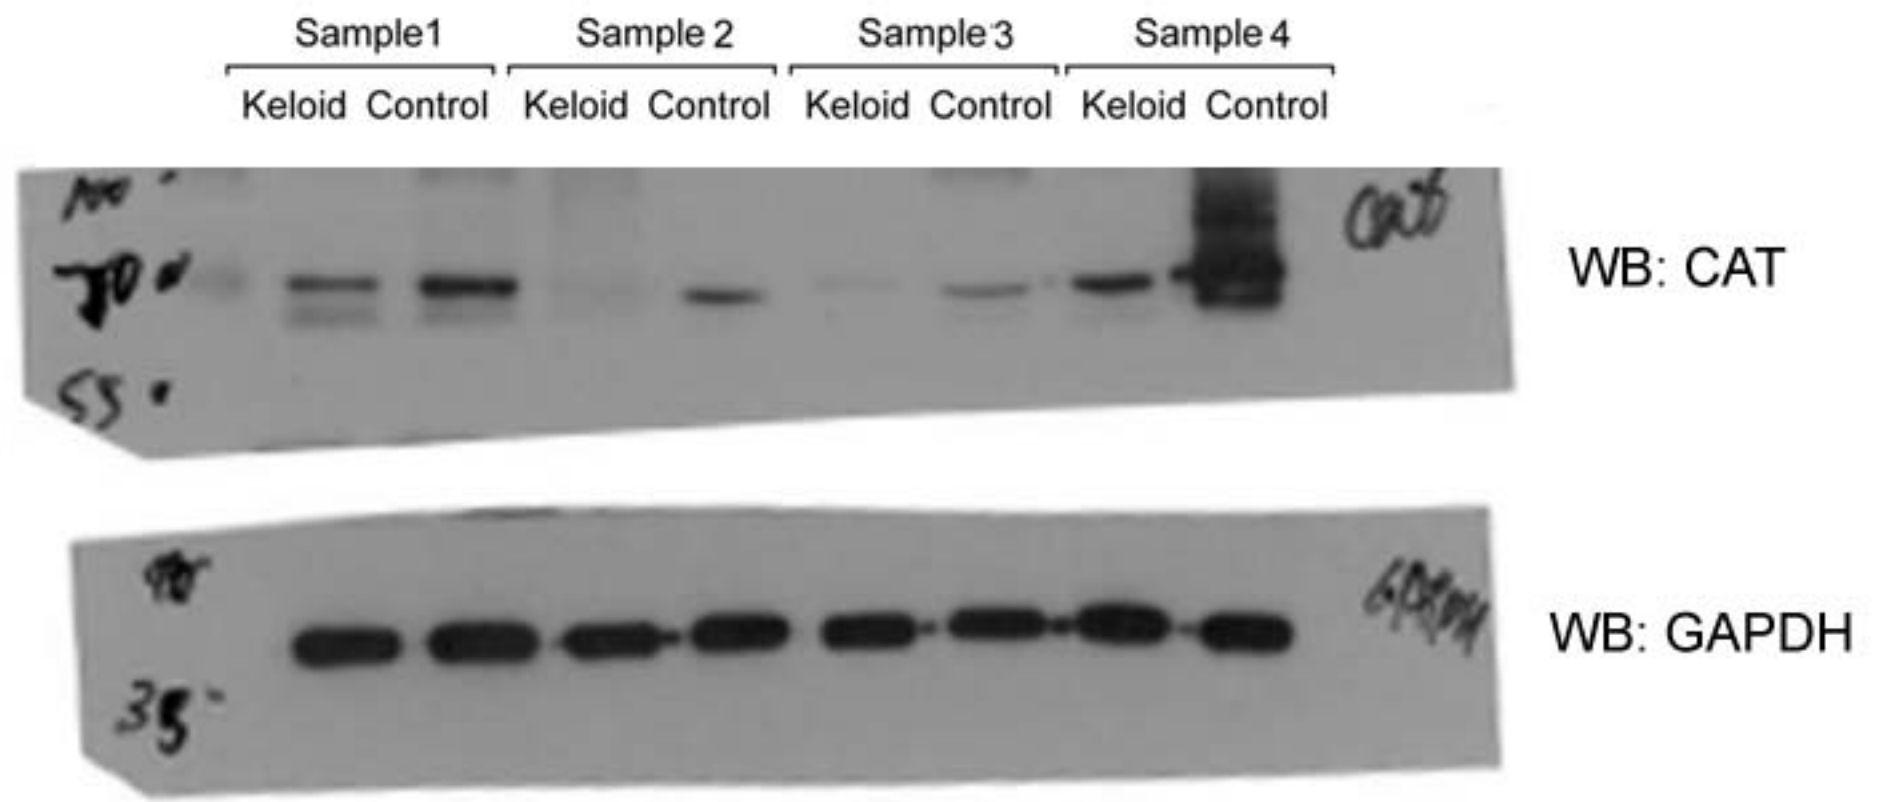

Figure 6d

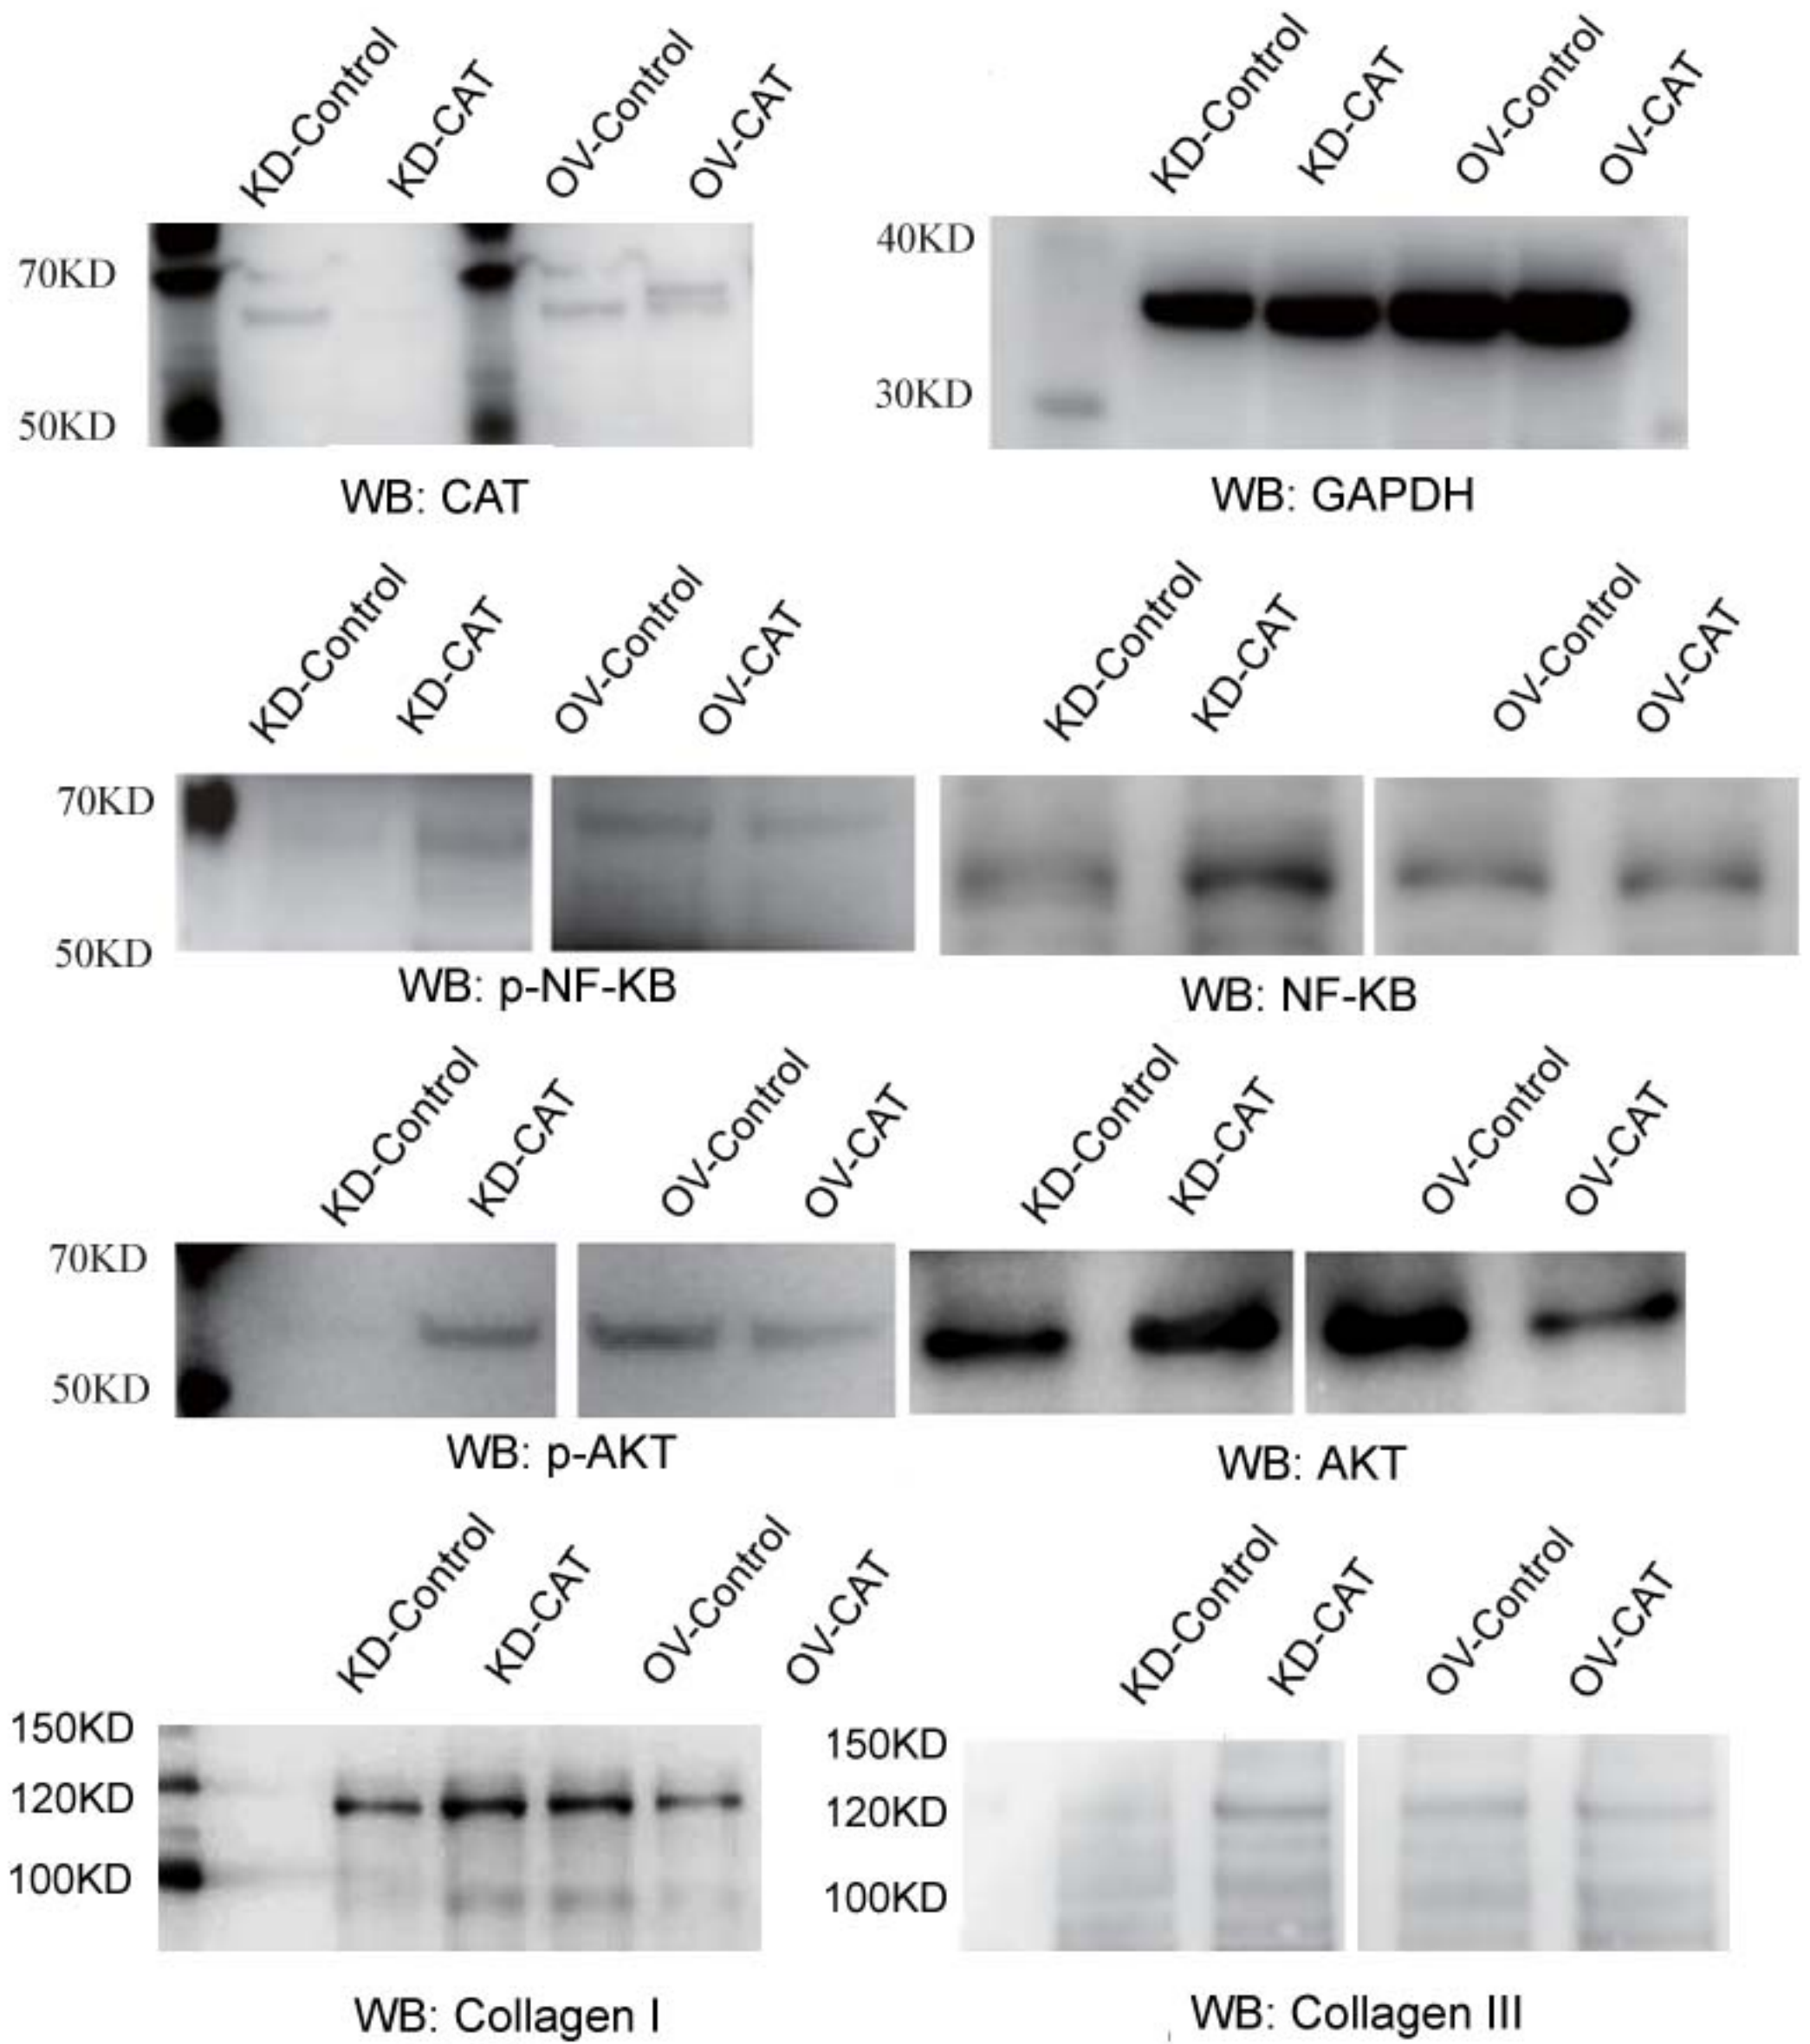

Supplement: mmc3.pdf [file mmc3.pdf]
